# Supplementary material for: Synthesis, in-silico and anti-inflammatory activities of novel coumarin derivatives
Source: Research Square preprint supplement (doi:10.21203/rs.3.rs-1916173/v1), 2022-08-11
Supplement: Supplementary file 1 [file 43c6ee7fdf418d7ae3c6cedb.docx]

Table 1: Structures of synthesized coumarins compounds of scheme 1 and 2

| S.No. | Structure | Name | M.F. | M.Wt. |
| --- | --- | --- | --- | --- |
| Scheme 1 | | | | |
| 1. 1 |  | 2-[(2-oxo-2*H*-1-benzopyran-4-yl)amino]-*N*’-[€-phenylmethylidene]acetohydrazide | C18H15N3O3 | 321.33 |
| 1. 2 |  | *N*’-[€-(4-chlorophenyl)methylidene]-2-[(2-oxo-2*H*-1-benzopyran-4-yl)amino]acetohydrazide | C18H14ClN3O3 | *355.78* |
| 1. 3 |  | *N*’-[€-(3-chlorophenyl)methylidene]-2-[(2-oxo-2*H*-1-benzopyran-4-yl)amino]acetohydrazide | C18H14ClN3O3 | *355.78* |
| 1. 4 |  | €-N’-(3-aminobenzylidene)-2-((2-oxo-2H-chromen-4-yl)amino)acetohydrazide | C18H14N4O5 | 366.33 |
| 1. 5 |  | *N*’-[€-(4-hydroxyphenyl)methylidene]-2-[(2-oxo-2*H*-1-benzopyran-4-yl)amino]acetohydrazide | C18H15N3O4 | *337.33* |
| 1. 6 |  | *N*’-[€-(3,4-dihydroxyphenyl)methylidene]-2-[(2-oxo-2*H*-1-benzopyran-4-yl)amino]acetohydrazide | C18H15N3O5 | *353.33* |
| 1. 7 |  | *N*’-{€-[4-(dimethylamino)phenyl]methylidene}-2-[(2-oxo-2*H*-1-benzopyran-4-yl)amino]acetohydrazide | C21H22N4O3 | *364.4* |
| 1. 8 |  | *N*’-[€-(3,4,5-trimethoxyphenyl)methylidene]-2-[(2-oxo-2*H*-1-benzopyran-4-yl)amino]acetohydrazide | C21H21N3O6 | *411.11* |
| 1. 9 |  | *N*’-[€-(3,4-dimethoxyphenyl)methylidene]-2-[(2-oxo-2*H*-1-benzopyran-4-yl)amino]acetohydrazide | C20H19N3O5 | *381.38* |
| 1. 10 |  | *N*’-[€-(4-bromophenyl)methylidene]-2-[(2-oxo-2*H*-1-benzopyran-4-yl)amino]acetohydrazide | C18H14BrN3O3 | *400.23* |
| Scheme 2 | | | | |
| 1. 11 |  | 2-[(2-oxo-2*H*-1-benzopyran-4-yl)(phenyl)amino]-*N*'-[(*E*)-phenylmethylidene]acetohydrazide | C24H19N3O3 | 397.426 |
| 1. 12 |  | 2-[(2-oxo-2*H*-1-benzopyran-4-yl)(phenyl)amino]-*N*'-[(*E*)-(4-chlorophenyl)methylidene]acetohydrazide | C24H18ClN3O3 | 431.87 |
| 1. 13 |  | 2-[(2-oxo-2*H*-1-benzopyran-4-yl)(phenyl)amino]-*N*'-[(*E*)-(3-chlorophenyl)methylidene]acetohydrazide | C24H18ClN3O3 | 431.87 |
| 1. 14 |  | 2-[(2-oxo-2*H*-1-benzopyran-4-yl)(phenyl)amino]-*N*'-[(*E*)-(3-nitrophenyl)methylidene]acetohydrazide | C24H18N4O5 | 442.42 |
| 1. 15 |  | 2-[(2-oxo-2*H*-1-benzopyran-4-yl)(phenyl)amino]-*N*'-[(*E*)-(4-hydroxyphenyl)methylidene]acetohydrazide | C24H19N3O4 | 413.42 |
| 1. 16 |  | 2-[(2-oxo-2*H*-1-benzopyran-4-yl)(phenyl)amino]-*N*'-[(*E*)-(3,4-dihydroxyphenyl)methylidene]acetohydrazide | C24H19N3O5 | 429.42 |
| 1. 17 |  | 2-[(2-oxo-2*H*-1-benzopyran-4-yl)(phenyl)amino]-*N*'-[(*E*)-( 4-dimethylaminophenyl)methylidene]acetohydrazide | C26H24N4O3 | 440.49 |
| 1. 18 |  | 2-[(2-oxo-2*H*-1-benzopyran-4-yl)(phenyl)amino]-*N*'-[(*E*)-( 3,4,5-trimethoxyphenyl)methylidene]acetohydrazide | C27H25N3O6 | 487.5 |
| 1. 19 |  | 2-[(2-oxo-2*H*-1-benzopyran-4-yl)(phenyl)amino]-*N*'-[(*E*)-( 3,4-dimethoxyphenyl)methylidene]acetohydrazide | C26H23N3O5 | 457.48 |
| 1. 20 |  | 2-[(2-oxo-2*H*-1-benzopyran-4-yl)(phenyl)amino]-*N*'-[(*E*)-( 4-bromophenyl)methylidene]acetohydrazide | C24H18BrN3O3 | 476.32 |

Table 2: Experimental schedule of treatment for assessment of anti-inflammatory activity in rats

| **S. No** | **Groups** | **Treatments** | **Number of animals** |
| --- | --- | --- | --- |
|  | Control group | Normal chow diet and saline | 05 |
|  | Toxic group | 1% Carrageenan solution (5 ml/kgb.w). | 05 |
|  | Standard | Carrageenan + Indomethacin (10 mg/kg b.w) | 05 |
|  | Treatment 1 | Carrageenan + Group 1 (50mg/kg) | 05 |
|  | Treatment 2 | Carrageenan + Group 2 (50mg/kg) | 05 |
|  | Treatment 3 | Carrageenan + Group 3 (50mg/kg) | 05 |
|  | Treatment 4 | Carrageenan + Group 4 (50mg/kg) | 05 |
|  | Treatment 5 | Carrageenan + Group 5 (50mg/kg) | 05 |
|  | Treatment 6 | Carrageenan + Group 6 (50mg/kg) | 05 |
| **Total animals required** | | | **45** |

**Table 3:** Docking results of scheme 1 compounds against TNF-alpha

| **S. No** | **Compounds** | **Protien** | **Binding energy** | **H-bonds Interactions** | **Residual Hydrophobic/Pi-Cation/Pi-Anion/Pi-Alkyl Interactions** |
| --- | --- | --- | --- | --- | --- |
| **Scheme 1** | | | | | |
|  | 2-[(2-oxo-2*H*-1-benzopyran-4-yl)amino]-*N*'-[(*E*)-phenylmethylidene]acetohydrazide | TNF-alpha | -7.1 | Glu67(B) | Tyr66(B), Gly66(B), Lys65(B), Pro20(B), Phe144(B), Ala145(B), Asp140(B) |
|  | *N*'-[(*E*)-(4-chlorophenyl)methylidene]-2-[(2-oxo-2*H*-1-benzopyran-4-yl)amino]acetohydrazide | TNF-alpha | -7.8 | Gly24(A), Lys65(A) | Gln21(C), Leu142(C), Tyr141(A), Lys65(A), Gly24(A), Phe144(A) |
|  | *N*'-[(*E*)-(3-chlorophenyl)methylidene]-2-[(2-oxo-2*H*-1-benzopyran-4-yl)amino]acetohydrazide | TNF-alpha | -7.4 | Asn34(A), Arg82(C) | Val17(A), Arg32(A), Tyr87(C), Ala33(A), Val91(C), Asn34(A), Arg82(C) |
|  | 2-[(2-oxo-2*H*-1-benzopyran-4-yl)amino]-*N*'-[(*E*)-(3-nitrophenyl)methylidene]acetohydrazide | TNF-alpha | -6.8 | Lys65(A), Gln67(A) | Lys65(A), Gln67(A), Tyr141(A), Asp143(C), Phe144(A) |
|  | *N*'-[(*E*)-(4-hydroxyphenyl)methylidene]-2-[(2-oxo-2*H*-1-benzopyran-4-yl)amino]acetohydrazide | TNF-alpha | -6.8 | Leu142(B) | Ala15(B), Ssp140(B), Gly66(B), Glu67(B), Tyr141(B), Pro70(B), Asp140(B), Gly24(B), Glu23(B), Pro20(B) |
|  | *N*'-[(*E*)-(3,4-dihydroxyphenyl)methylidene]-2-[(2-oxo-2*H*-1-benzopyran-4-yl)amino]acetohydrazide | TNF-alpha | -6.6 | Asp140(A) | Leu142(A), Phe143(A), Asp143(A), Ala145(A), Pro20(A), Glu23(A), Gly24(A), Gly66(A), Lys65(A), Tyr141(A), Gln67(A) |
|  | *N*'-{(*E*)-[4-(dimethylamino)phenyl]methylidene}-2-[(2-oxo-2*H*-1-benzopyran-4-yl)amino]acetohydrazide | TNF-alpha | -7.2 | Gln27(A), Leu26(A) | Asn46(A), Pro134(A), Glu135(A), Ile136(A), Glu25(A), Leu47(A), Asn30(A), Trp28(A), Leu29(A) |
|  | *N*'-[(*E*)-(3,4,5-trimethoxyphenyl)methylidene]-2-[(2-oxo-2*H*-1-benzopyran-4-yl)amino]acetohydrazide | TNF-alpha | -7.7 | Ile136(B), Gln47(B) | Ser131(B), Glu135(B), Ala135(B), Ile83(B), Lys90(B), Gln88(B), Arg131(B), Asp45(B), Asn46(B), Leu26(B) |
|  | *N*'-[(*E*)-(3,4-dimethoxyphenyl)methylidene]-2-[(2-oxo-2*H*-1-benzopyran-4-yl)amino]acetohydrazide | TNF-alpha | -6.8 | Glu27(C) | Asn46(C), Leu43(C), Glu135(C), Ile136(C), Leu26(C), Pro139(C), Gly24(C), Glu25(C), Asp45(C), Arg44(C), Asn30(C), Trp28(C) |
|  | *N*'-[(*E*)-(4-bromophenyl)methylidene]-2-[(2-oxo-2*H*-1-benzopyran-4-yl)amino]acetohydrazide | TNF-alpha | -7.2 | Gln47(B) | Asp45(B), Ala134(B), Ile136(B), Leu26(B), Pro139(B), Glu25(B), Asn46(B), Ser133(B), Glu135(B), Lys90(B), Ile83(B) |
| **Scheme 2** | | | | | |
|  | 2-[(2-oxo-2*H*-1-benzopyran-4-yl)(phenyl)amino]-*N*'-[(*E*)-phenylmethylidene]acetohydrazide | TNF-alpha | -6.6 | Gly24(B), Leu124(B) | Gln25(B), Asp143(B), Phe144(B), Asp140(B), Lys65(B), Gln67(B), Gly66(B), Tyr141(B), Pro20(B), Gly23(B), Pro139(B) |
|  | 2-[(2-oxo-2*H*-1-benzopyran-4-yl)(phenyl)amino]-*N*'-[(*E*)-(4-chlorophenyl)methylidene]acetohydrazide | TNF-alpha | -6.4 | Arg50(A) | Ser86(C), Arg32(A), Ala33(A), Tyr87(A), Val91(C), Asn34(A), Ala84(C). |
|  | 2-[(2-oxo-2*H*-1-benzopyran-4-yl)(phenyl)amino]-*N*'-[(*E*)-(3-chlorophenyl)methylidene]acetohydrazide | TNF-alpha | -6.8 | Thr77(A) | Glu146(A), Ile97(A), Gln149(B), Lys90(A), His78(A), Glu135(A), Ser81(A), Asn92(A), Asn139(A), Ile136(A), Leu25(A) |
|  | 2-[(2-oxo-2*H*-1-benzopyran-4-yl)(phenyl)amino]-*N*'-[(*E*)-(3-nitrophenyl)methylidene]acetohydrazide | TNF-alpha | -7.9 | Gln67(C), Pro20(C), Phe144(C), Ala145(C) | Gln67(C), Pro20(C), Phe144(C), Ala145(C), Tyr141(C), Lys65(C), Asp143(C) |
|  | 2-[(2-oxo-2*H*-1-benzopyran-4-yl)(phenyl)amino]-*N*'-[(*E*)-(4-hydroxyphenyl)methylidene]acetohydrazide | TNF-alpha | -8.7 | Lys65(C), Gln67(C) | Lys65(C), Gln67(C), Asp140(C), Ala145(C), Asp143(C) |
|  | 2-[(2-oxo-2*H*-1-benzopyran-4-yl)(phenyl)amino]-*N*'-[(*E*)-(3,4-dihydroxyphenyl)methylidene]acetohydrazide | TNF-alpha | -7.1 | Arg82(B) | Asn92(B), Val17(C), Leu36(C), Phe124(B) |
|  | 2-[(2-oxo-2*H*-1-benzopyran-4-yl)(phenyl)amino]-*N*'-[(*E*)-( 4-dimethylaminophenyl)methylidenecfv00bfgb[]]acetohydrazide bhh uuuuuub | TNF-alpha | -7.1 | Phe144(C), Ala145(C) | Phe140(C) |
|  | 2-[(2-oxo-2*H*-1-benzopyran-4-yl)(phenyl)amino]-*N*'-[(*E*)-( 3,4,5-trimethoxyphenyl)methylidene]acetohydrazide | TNF-alpha | -7.8 | Leu26(B), Glu47(B) | Gln25(B), Gln27(B), Asn46(B), Glu135(B), Ser133(B), Gln88(B), Ple83(B), Lys90(B), Asp45(B), Ale136(B), Pro139(B) |
|  | 2-[(2-oxo-2*H*-1-benzopyran-4-yl)(phenyl)amino]-*N*'-[(*E*)-( 3,4-dimethoxyphenyl)methylidene]acetohydrazide | TNF-alpha | -6.9 | Phe144(C), Ala145(C), Asp140(C) | Lys65(C), Leu142(C), Glu23(C) |
|  | 2-[(2-oxo-2*H*-1-benzopyran-4-yl)(phenyl)amino]-*N*'-[(*E*)-( 4-bromophenyl)methylidene]acetohydrazide | TNF-alpha | -6.6 | Ala145(A), Phe144(A), Gly24(A) | Pro20(A), Gln21(A), Glu23(A), Leu142(A), Gln67(A), Gly66(A), Lys65(A), Asp140(A), Asp143(A) |

**Table 4:** Chemical compounds and binding energy to TNF-a

| **S. No** | **Structure** | **Binding score** |
| --- | --- | --- |
| **Scheme 1** | | |
| **Treatment 1** | **Compound number 2**  N'-[(E)-(4-chlorophenyl)methylidene]-2-[(2-oxo-2H-1-benzopyran-4-yl)amino]acetohydrazide | **-7.8** |
| **Treatment 2** | **Compound number 8**  N'-[(E)-(3,4,5-trimethoxyphenyl)methylidene]-2-[(2-oxo-2H-1-benzopyran-4-yl)amino]acetohydrazide | **-7.7** |
| **Treatment 3** | **Compound number 10**  N'-[(E)-(4-bromophenyl)methylidene]-2-[(2-oxo-2H-1-benzopyran-4-yl)amino]acetohydrazide | **-7.2** |
| **Scheme 2** | | |
| **Treatment 4** | **Compound number 1**  2-[(2-oxo-2H-1-benzopyran-4-yl)(phenyl)amino]-N'-[(E)-phenylmethylidene]acetohydrazide | **-7.9** |
| **Treatment 5** | **Compound number 4**  2-[(2-oxo-2H-1-benzopyran-4-yl)(phenyl)amino]-N'-[(E)-(3-nitrophenyl)methylidene]acetohydrazide | **-6.9** |
| **Treatment 6** | **Compound number 8**  2-[(2-oxo-2H-1-benzopyran-4-yl)(phenyl)amino]-N'-[(E)-( 4-bromophenyl)methylidene]acetohydrazide | **-6.6** |

**Table 5:** Volumes of the hind paw with carrageenan-induced edema (ml)

| **Early phase** | **Time (min)** | **Control** | **Carrageenan** | **Indomethacin** | **Treatment 1** | **Treatment 2** | **Treatment 3** | **Treatment 4** | **Treatment 5** | **Treatment 6** |
| --- | --- | --- | --- | --- | --- | --- | --- | --- | --- | --- |
| 0  min | 2.57 ± 0.10 | 2.63 ± 0.12 | 2.57 ± 0.14 | 2.73 ± 0.15 | 2.67 ± 0.19 | 2.62 ± 0.13 | 2.65 ± 0.13 | 2.63 ± 0.11 | 2.73 ± 0.13 |
| 30 min | 2.59 ± 0.13 | 3.86 ± 0.16### | 3.43 ± 0.08* | 3.48 ± 0.18 | 3.45 ± 0.14 | 3.47 ± 0.13 | 3.47 ± 0.10 | 3.49 ± 0.18 | 3.47 ± 0.16 |
| 60 min | 2.59 ± 0.15 | 4.45 ± 0.13### | 3.99 ± 0.15* | 4.36 ± 0.15 | 3.99 ± 0.17* | 4.09 ± 0.15 | 3.91 ± 0.15* | 4.14 ± 0.16 | 4.35 ± 0.15 |
| 120 min | 2.56 ± 0.15 | 5.11 ± 0.15### | 4.38 ± 0.15** | 4.57 ± 0.16* | 4.36 ± 0.20** | 4.57 ± 0.24* | 4.41 ± 0.17** | 4.58 ± 0.18 | 4.65 ± 0.23 |
| **Late phase** | 180 min | 2.56 ± 0.14 | 5.14 ± 0.15### | 4.20 ± 0.19** | 4.44 ± 0.23* | 4.32 ± 0.19** | 4.51 ± 0.27* | 4.36 ± 0.20** | 4.45 ± 0.24* | 4.48 ± 0.28* |
| 240 min | 2.56 ± 0.08 | 5.10 ± 0.14### | 4.16 ± 0.19*** | 4.39 ± 0.24* | 4.30 ± 0.21** | 4.44 ± 0.27* | 4.28 ± 0.19** | 4.35 ± 0.16** | 4.39 ± 0.26* |
| 300 min | 2.63 ± 0.04 | 5.15 ± 0.13### | 3.45 ± 0.54*** | 4.23 ± 0.25* | 3.65 ± 0.30*** | 4.29 ± 0.26* | 3.57 ± 0.12*** | 4.15 ± 0.27** | 4.33 ± 0.25* |

Data are expressed as mean ± SD (n = 5). Values with superscripts (#) is significantly different between normal control vs diabetic control and superscripts (*) is significantly different between diabetic control vs treatment groups. The value p < 0.05 considered significant. The symbol represents the significance level such as #/* (p < 0.05); ##/** (p < 0.01) and ###/*** (p < 0.001).
